# Supplementary material for: In situ preparation of graphene oxide supported Pd nanoparticles in an ionic liquid and the long-term catalytic stability for the Heck reaction
Source: Royal Society of Chemistry journal article supplement (doi:10.1039/c5ta03767k), 2015-01-01

## Supporting information

### In-Situ preparation of Graphene Oxide Supported Pd nanoparticles in Ionic Liquid and the Long-term Catalytic Stability for the Heck Reaction

Dan Liu<sup>a,b</sup>, Changjun Zhang<sup>a,b</sup>, Fei Wang<sup>a,b</sup>, Zhongyuan Huang<sup>a,b</sup>, Ning shuang Zhang<sup>a,b</sup>, Haihui Zhou<sup>\*a,b</sup> and Yafei Kuang<sup>\*a,b</sup>

---

*a. State Key Laboratory for Chemo/Biosensing and Chemometrics, Hunan University, Changsha, China; Fax: +86-731-88713642; Tel: +86-731-88821603; E-mail: yafeik@163.com*

*b. College of Chemistry and Chemical Engineering, Hunan University, Changsha, China; Fax: +86-731-88713642; Tel: +86-731-88821603; E-mail: yafeik@163.com*

Fig. S1 shows the FTIR spectra of GO, RGO and Pd/RGO. The FT-IR spectrum of the GO shows a broad absorption band at  $3430\text{ cm}^{-1}$ , which is related to O-H group due to the residual moisture in the sample, and absorption bands at  $1630\text{ cm}^{-1}$  and  $1730\text{ cm}^{-1}$  are related to C=C and C=O groups. The absorption bands at  $1050\text{ cm}^{-1}$  and  $1390\text{ cm}^{-1}$  can be attributed to the alkoxy C-O and O-H groups. In the FT-IR spectrum of RGO and Pd/RGO, the relative intensity of the C=O stretching at  $1730\text{ cm}^{-1}$  significantly decreases, indicating that most carboxyl functionalities have been reduced. These results clearly demonstrate that the GO was reduced after chemical reduction.

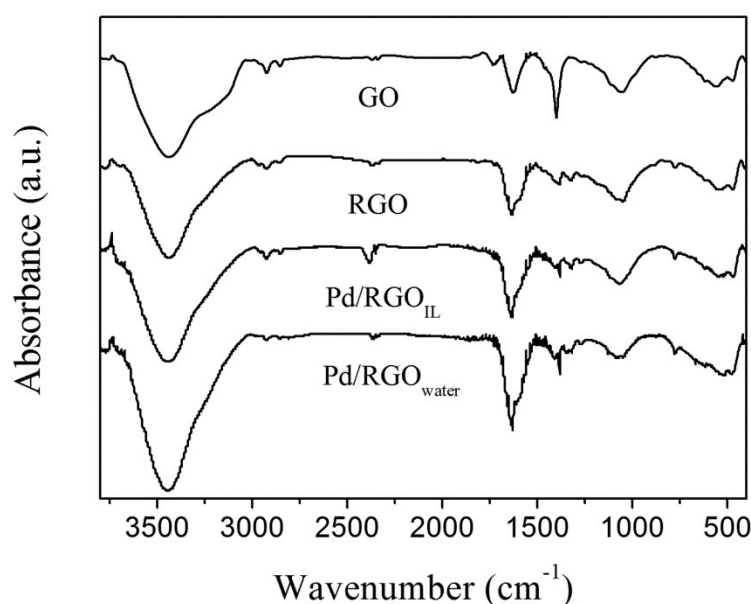

**Fig. S1** FT-IR transmittance spectra of GO, RGO and Pd/RGO

Fig. S2 displays the TGA curve of GO, RGO and Pd/RGO. The TGA curve of GO shows a significant weight loss (50%) before  $300\text{ }^{\circ}\text{C}$ , presumably due to the removal of adsorbed water and decomposition of the labile oxygen-containing functional groups. For RGO and Pd/RGO, there is only a light weight loss about 19 and 20% from  $100$  to  $800\text{ }^{\circ}\text{C}$ , which indicates that the oxygen-containing groups have been almost reduced by  $\text{NaBH}_4$  solution. The above results show that Pd/RGO has good thermal stability.

The catalytic activities of Pd/RGO-IL with various Pd loading were evaluated at  $130\text{ }^{\circ}\text{C}$ . As shown in Table S1, the product conversion firstly increases, reach a peak value, and then decreases when increasing Pd loading. The highest product conversion of 95% is acquired at the Pd loading of  $0.15\text{ mg mL}^{-1}$ . When the Pd mass loading exceeded  $0.15\text{ mg mL}^{-1}$ , the product conversion decreases, which may be ascribed to the agglomeration of Pd nanoparticles on the RGO surface resulting in smaller specific surface area.

Fig. S3 shows the stability of Pd/RGO catalyst in IL after the third, sixth and tenth run. It can be clearly seen that there is no precipitation occurring in all cyclic reactions. Our further results show that the Pd/RGO catalyst can be stably suspended in IL for over two months. The Pd/RGO-IL system exhibits good stability.

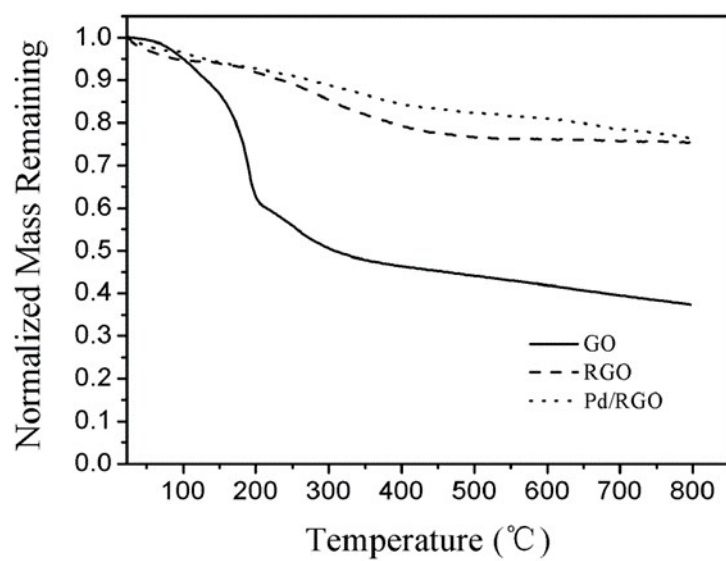

**Fig. S2** TGA curves of GO, RGO and Pd/RGO

**Table S1.** Product conversion for coupling of iodobenzene with butyl acrylate with different Pd loadings

| Entry | Pd loading (mg mL <sup>-1</sup> ) | conversion(%) |
|-------|-----------------------------------|---------------|
| 1     | 0.04                              | 52            |
| 2     | 0.08                              | 69            |
| 3     | 0.15                              | 95            |
| 4     | 0.3                               | 87            |
| 5     | 0.6                               | 71            |

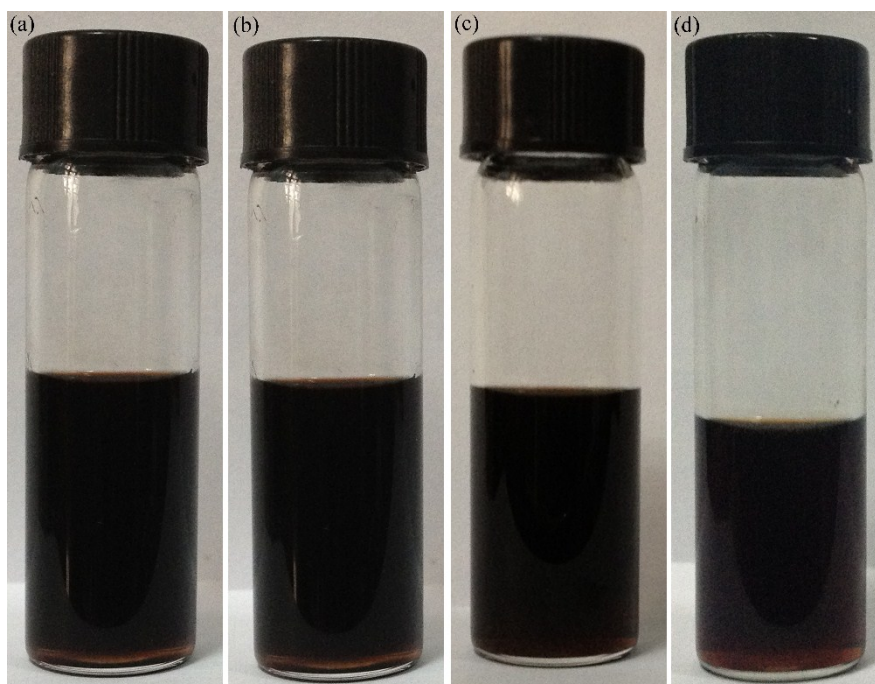

**Fig. S3** Photographs (a), (b) and (c) correspond to the stability of Pd/RGO catalyst in IL after the third, sixth and tenth run, respectively.

After the reaction completed, the products and Pd/RGO-IL system were extracted with 5% ethyl acetate in petroleum ether (5 mL  $\times$  3). Products in the resulting suspension were analyzed by a Gas Chromatograph (GC, Shimadzu GC-2014). The conversion was measured by the normalization method. The formulas are listed below:

$$w_i = \frac{m_i}{m_1 + m_2 + \dots + m_n} \times 100\% = \frac{f_i A_i}{\sum_{i=1}^n (f_i A_i)} \times 100\%$$

$m_i$ ,  $A_i$  and  $w_i$  are respectively the quality, peak area and the quality score of products.

$$f_i = \frac{f'_i}{f'_s} = \frac{m_i/A_i}{m_s/A_s} = \frac{m_i}{m_s} \times \frac{A_s}{A_i}$$

$f_i$  is the relative quantitative calibration factor, subscript i and s are represented product and reference material. N-heptane is chosen for reference material.

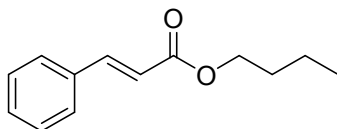

**Butyl cinnamate(3a)**

Purified by flush column chromatography (silica gel, Hexane/EtoAc=30/1);

$^1\text{H}$  NMR (400MHz,  $\text{CDCl}_3$ , TMS)  $\delta$  0.90 (t,  $J=7.2$  Hz, 3H), 1.33-1.37 (m, 2H), 1.58-1.61 (m, 2H), 4.14 (t,  $J=6.8$  Hz, 2H), 6.36 (d,  $J=16.0$  Hz, 1H), 7.29-7.30 (m, 3H), 7.43-7.46 (m, 2H), 7.60 (d,  $J=16.0$  Hz, 1H) ppm.

$^{13}\text{C}$  NMR (100MHz,  $\text{CDCl}_3$ )  $\delta$  13.7, 19.1, 30.7, 64.4, 111.2, 128.0, 128.8, 130.2, 134.4, 144.5, 144.5.

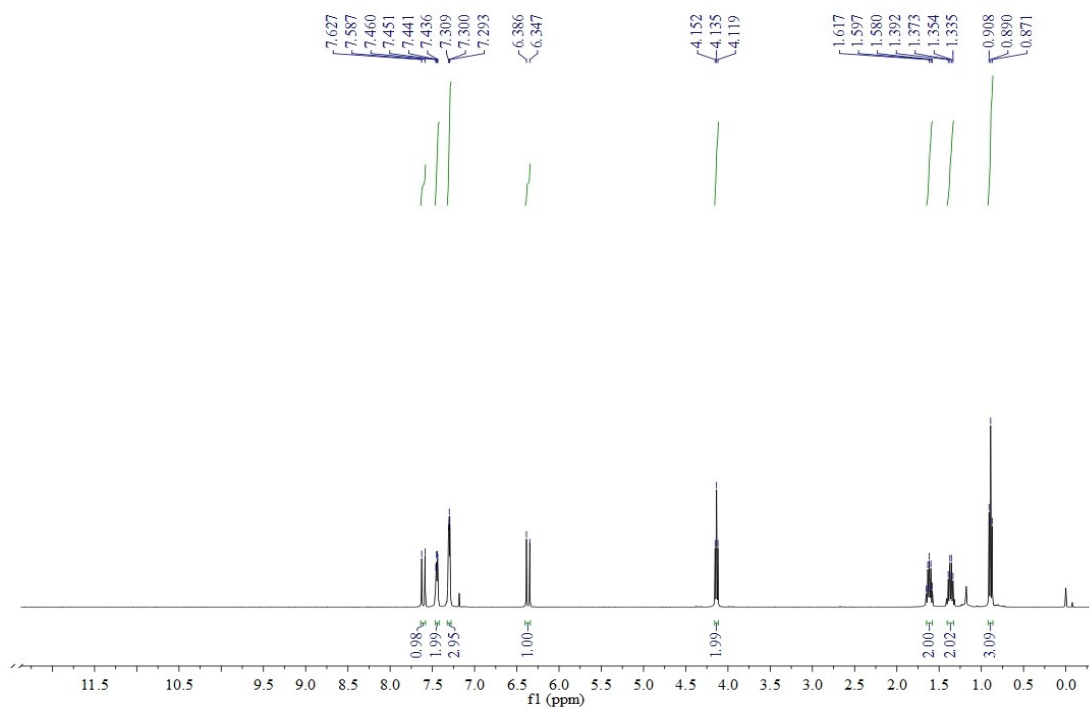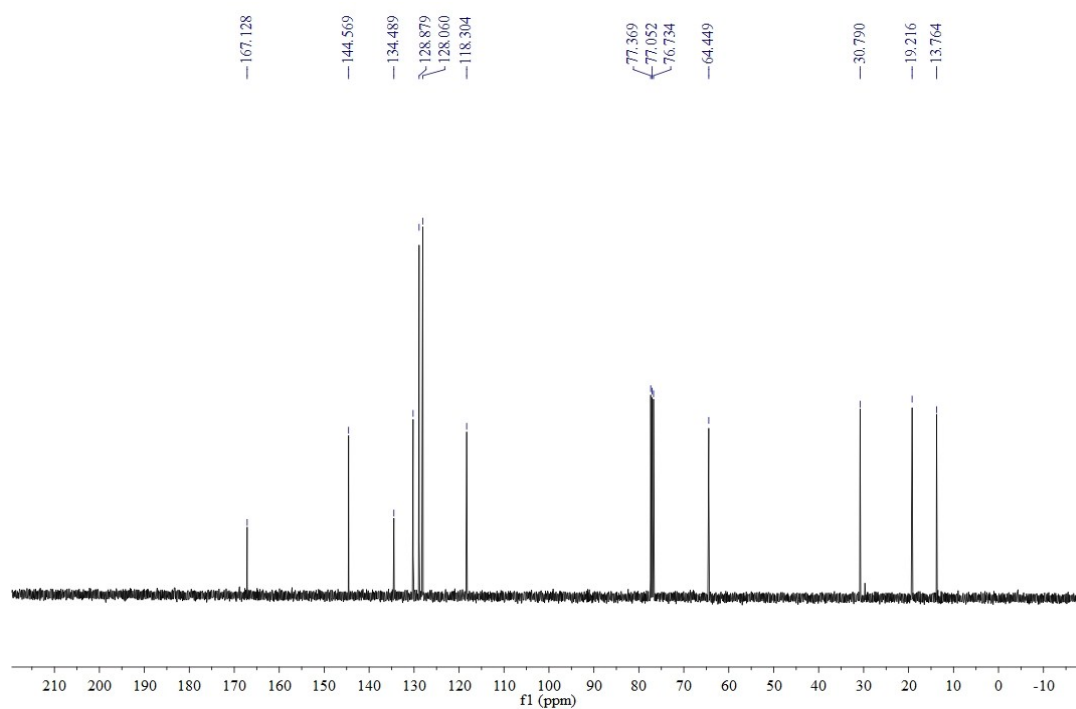

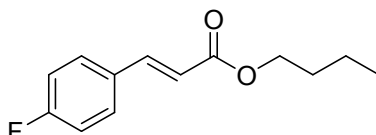

**Butyl 3-(4-fluorophenyl)acrylate (3f)**

Purified by flush column chromatography (silica gel, Hexane/EtoAc=15/1);

$^1\text{H}$  NMR (400MHz,  $\text{CDCl}_3$ )  $\delta$  0.89 (t,  $J=7.2$  Hz, 3H), 1.35-1.37 (m, 2H), 1.60-1.61 (m, 2H), 4.14 (t,  $J=6.8$  Hz, 2H), 6.29 (d,  $J=16.0$  Hz, 1H), 6.97-7.02 (m, 2H), 7.42-7.43 (m, 1H), 7.57 (d,  $J=16.0$  Hz, 1H) ppm.

$^{13}\text{C}$  NMR (100MHz,  $\text{CDCl}_3$ )  $\delta$  12.7, 18.1, 29.7, 63.4, 114.8, 115.1, 117.0, 128.8, 128.9, 142.3, 161.5, 164.0, 165.9.

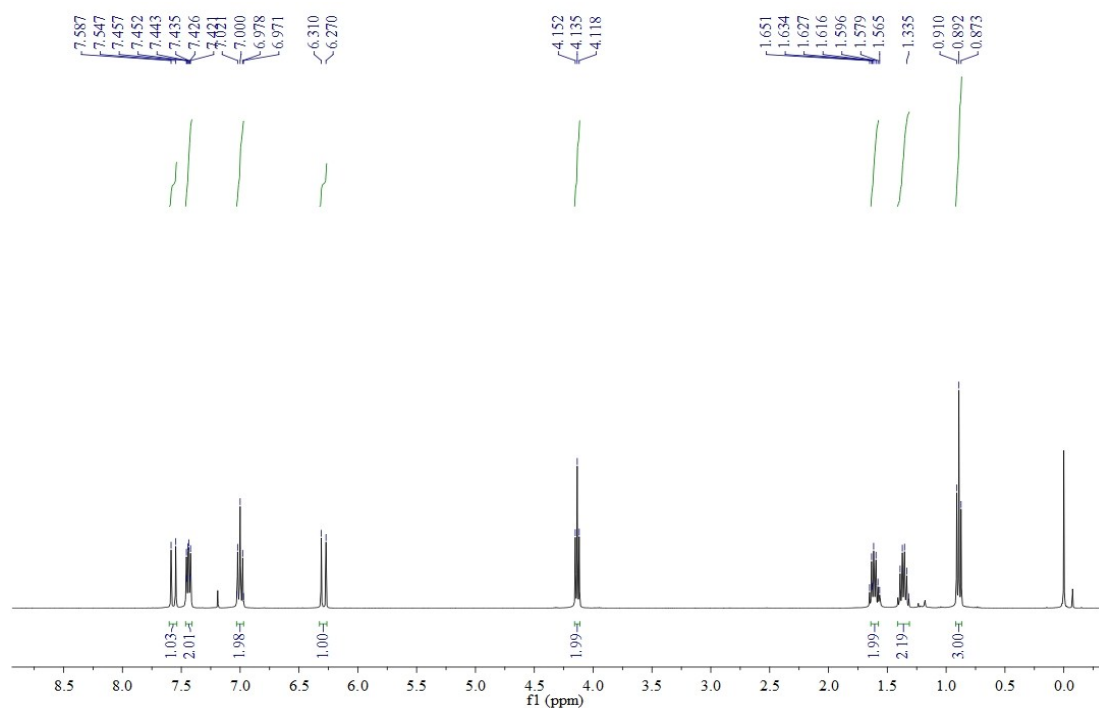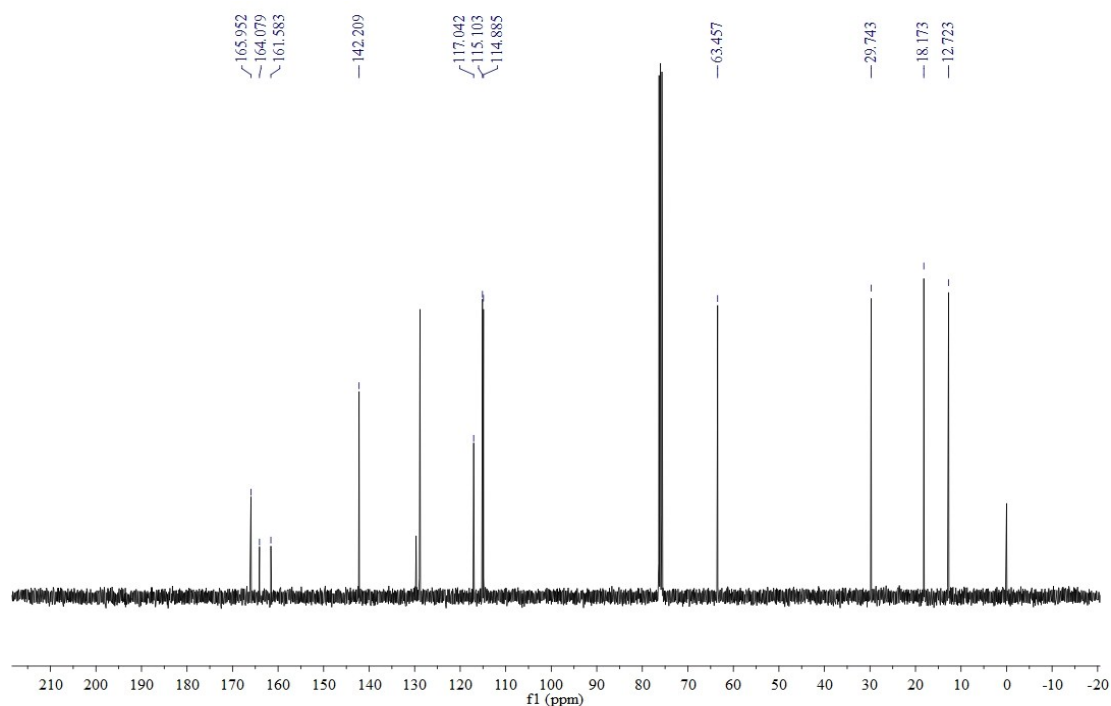

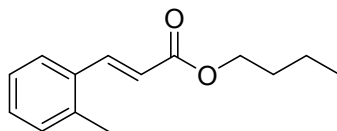

**Butyl 3-o-tolylacrylate (3d)**

Purified by flush column chromatography (silica gel, Hexane/EtoAc=40/1);

$^1\text{H}$  NMR (400MHz,  $\text{CDCl}_3$ )  $\delta$  0.91 (t,  $J=7.2$  Hz, 3H), 1.35-1.37 (m, 2H), 1.62-1.63 (m, 2H), 2.37 (s, 3H), 4.16 (t,  $J=6.8$  Hz, 2H), 6.30 (d,  $J=16.0$  Hz, 1H), 7.12-7.15 (m, 2H), 7.20-7.22 (m, 1H), 7.47-7.49 (m, 1H), 7.80 (d,  $J=16.0$  Hz, 1H) ppm.

$^{13}\text{C}$  NMR (100MHz,  $\text{CDCl}_3$ )  $\delta$  9.4, 14.8, 15.4, 26.4, 60.0, 114.9, 115.0, 121.9, 125.6, 126.0, 133.2, 137.8, 162.7 .

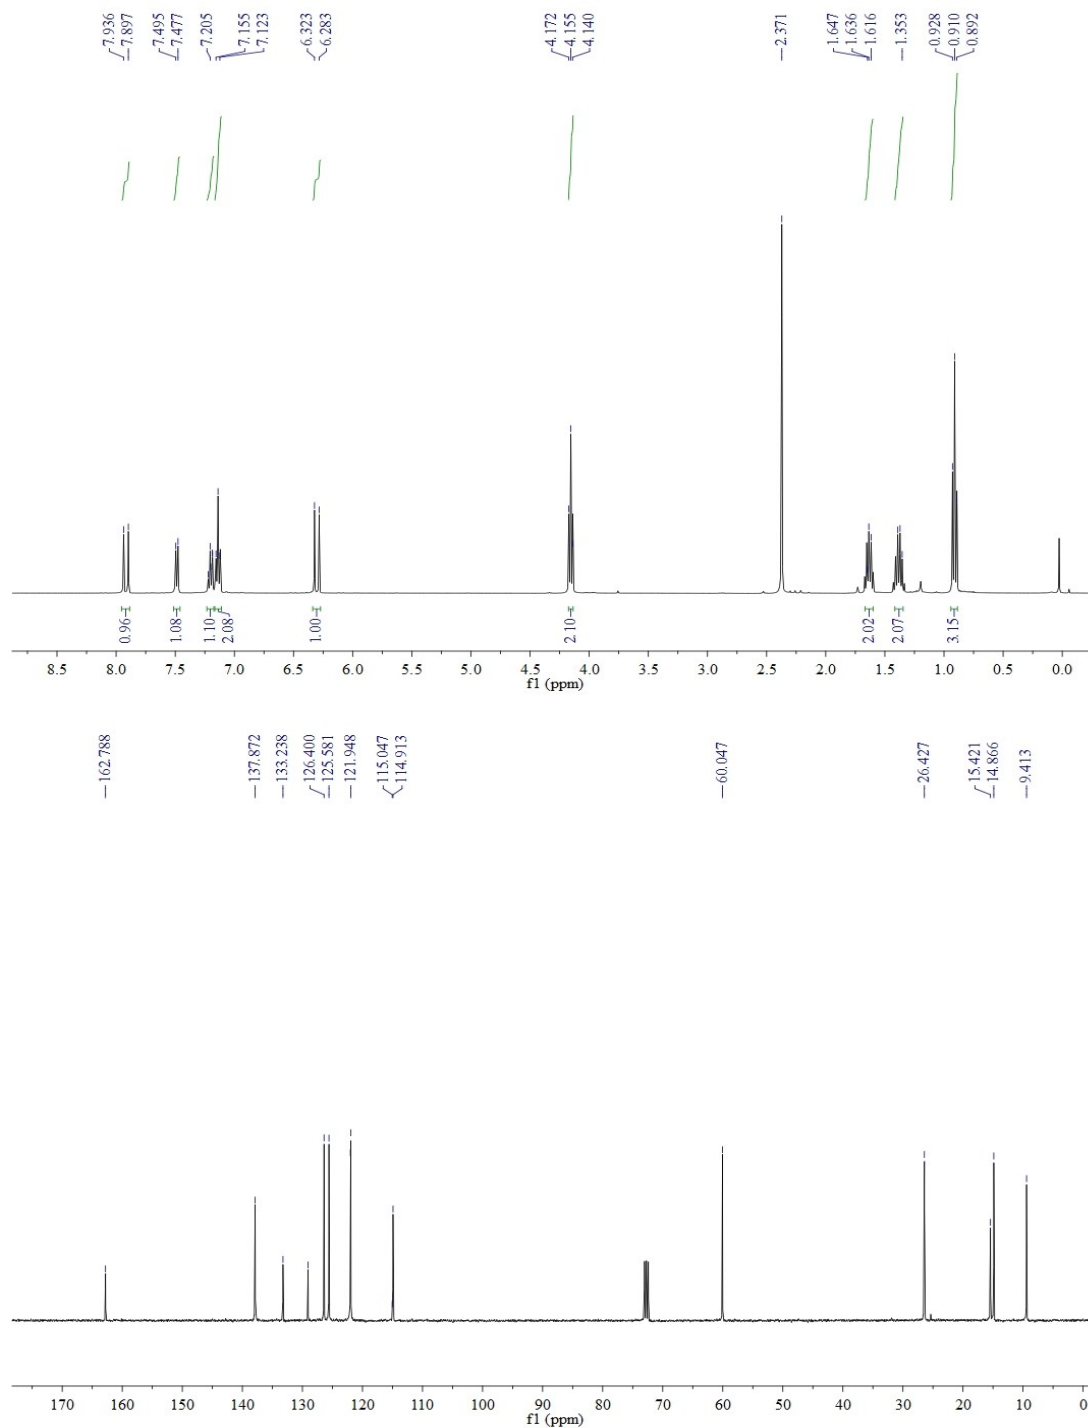

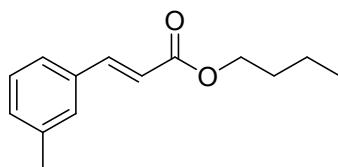

**Butyl 3-m-tolylacrylate (3h)**

Purified by flush column chromatography(silica gel,Hexane/EtoAc=40/1);

$^1\text{H}$  NMR (400MHz,  $\text{CDCl}_3$ )  $\delta$  0.97 (t,  $J=7.2$  Hz, 3H), 1.41-1.43 (m, 2H), 1.67-1.69 (m, 2H), 2.37 (s, 3H), 4.21 (t,  $J=6.8$  Hz, 2H), 6.43 (d,  $J=16.0$  Hz, 1H), 7.18-7.20 (m, 1H), 7.25-7.29 (m, 1H), 7.32-7.34 (m, 1H), 7.66 (d,  $J=16.0$  Hz, 1H) ppm.

$^{13}\text{C}$  NMR (100MHz,  $\text{CDCl}_3$ )  $\delta$  9.4, 14.8, 26.5, 51.1, 60.0, 106.7, 114.4, 116.3, 119.1, 124.5, 127.0, 135.6, 153.9, 163.2 .

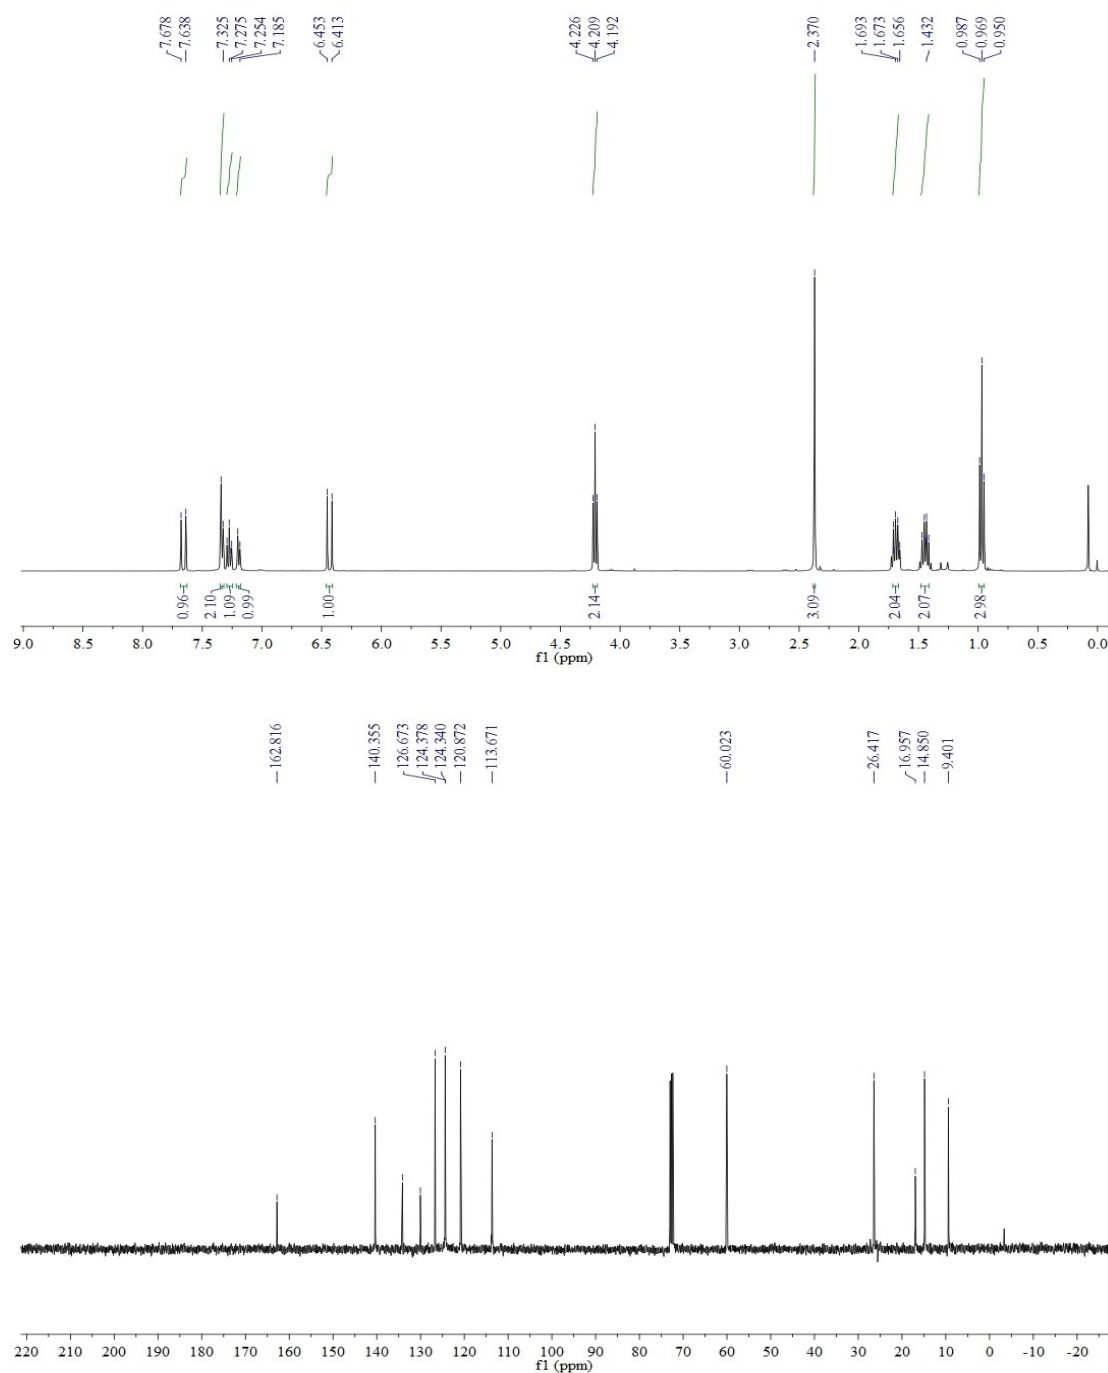

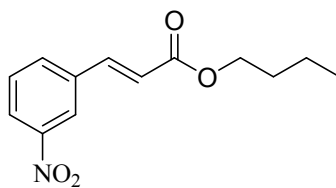

**Butyl 3-(3-nitrophenyl)acrylate (3g)**

Purified by flush column chromatography(silica gel,Hexane/EtoAc=20/1);

$^1\text{H}$  NMR (400MHz,  $\text{CDCl}_3$ )  $\delta$  0.90 (t,  $J=7.2$  Hz, 3H), 1.32-1.36 (m, 2H), 1.59-1.63 (m, 2H), 2.46 (s, 3H), 4.16 (t,  $J=6.8$  Hz, 2H), 6.50 (d,  $J=16.0$  Hz, 1H), 7.49-7.53 (m, 1H), 7.64 (d,  $J=16.0$  Hz, 1H), 7.74-7.76 (m, 1H), 8.14-8.15 (m, 1H), 8.31 (s, 1H) ppm.

$^{13}\text{C}$  NMR (100MHz, $\text{CDCl}_3$ )  $\delta$  12.7, 18.1, 30.0, 63.8, 120.4, 121.3, 126.4, 128.9, 132.6, 135.2, 140.6, 147.6,165.2 .

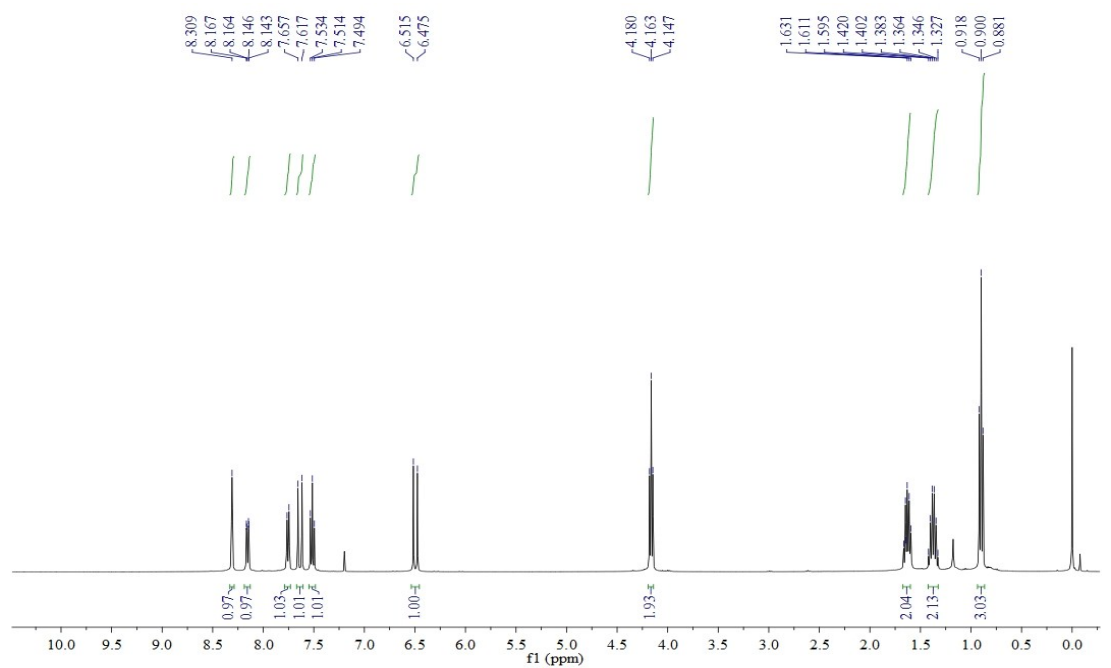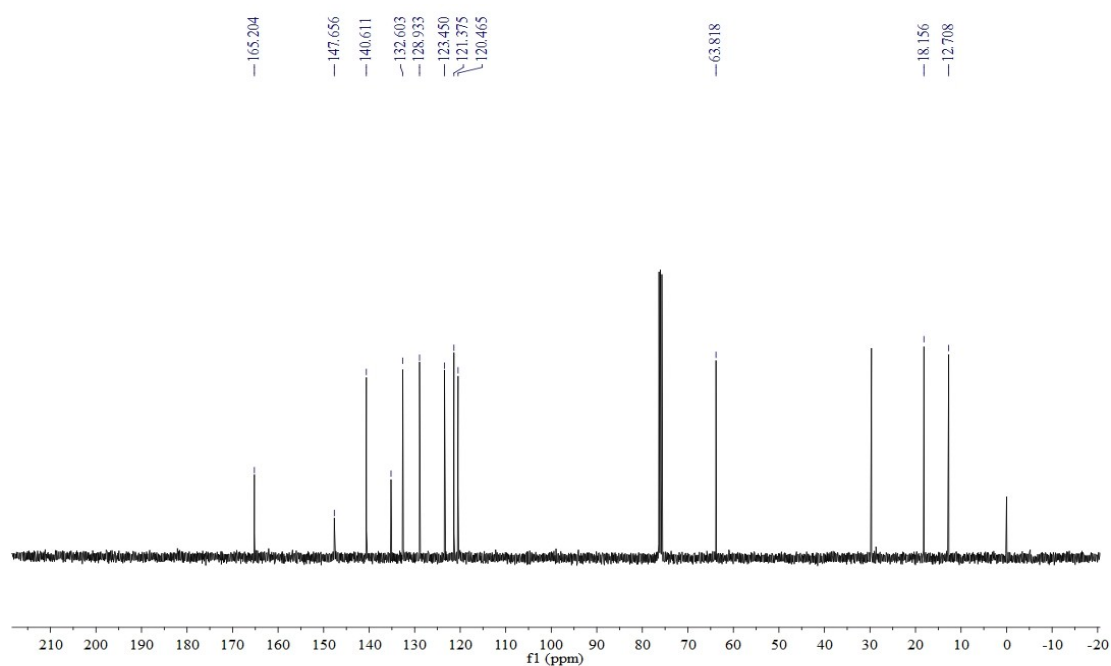

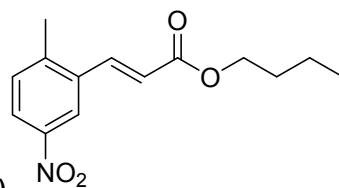

**Butyl 3-(2-methyl-5-nitrophenyl)acrylate(3e)**

Purified by flush column chromatography (silica gel, Hexane/EtoAc=20/1);

$^1\text{H}$  NMR (400MHz,  $\text{CDCl}_3$ )  $\delta$  0.91 (t,  $J=7.2$  Hz, 3H), 1.36-1.38 (m, 2H), 1.63-1.64 (m, 2H), 2.46 (s, 3H), 4.17 (t,  $J=6.8$  Hz, 2H), 6.43 (d,  $J=16.0$  Hz, 1H), 7.29-7.31 (m, 1H), 7.82 (d,  $J=16.0$  Hz, 1H), 8.02-8.04 (m, 1H), 8.32-8.33 (m, 1H) ppm.

$^{13}\text{C}$  NMR (100MHz,  $\text{CDCl}_3$ )  $\delta$  18.2, 19.0, 29.7, 63.8, 120.2, 121.3, 123.0, 130.6, 133.8, 138.7, 143.7, 145.8, 165.3.

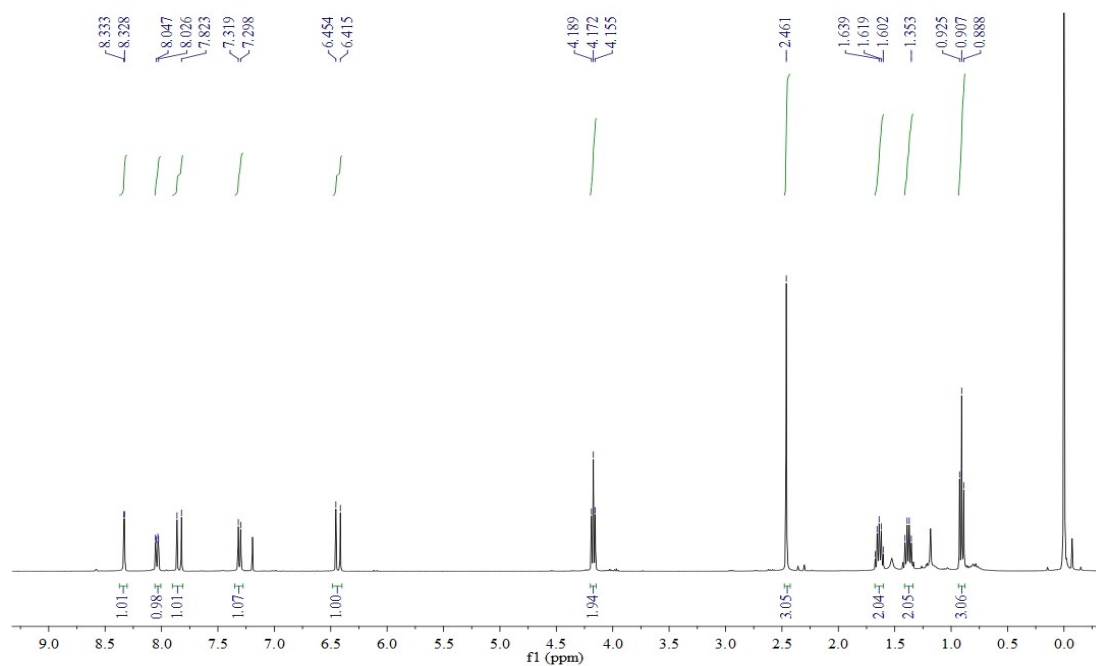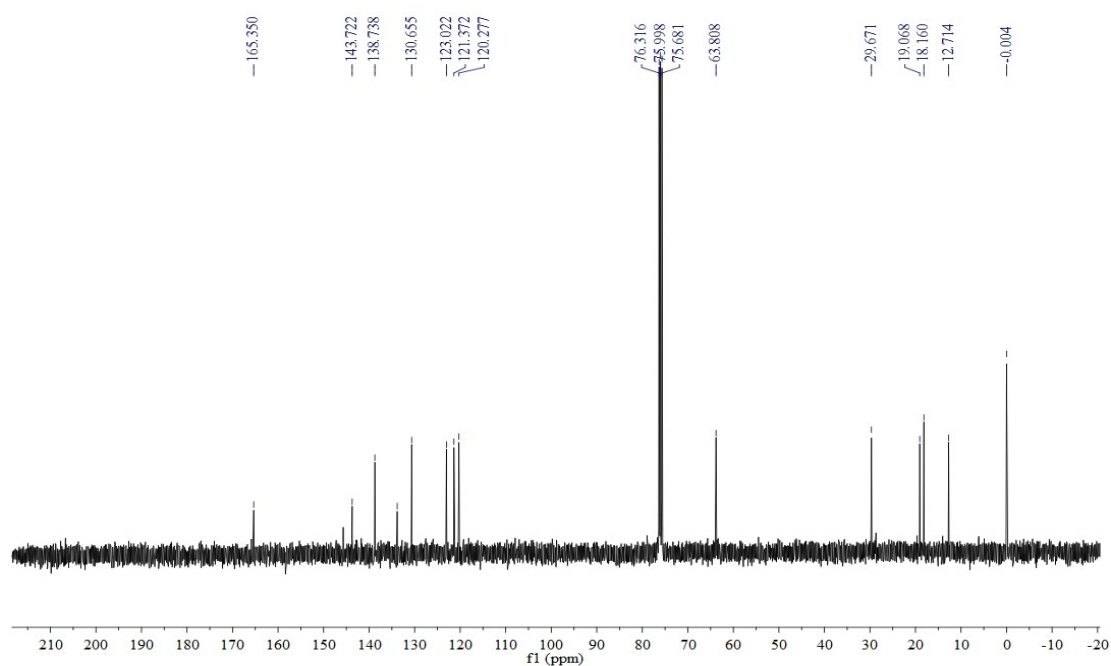

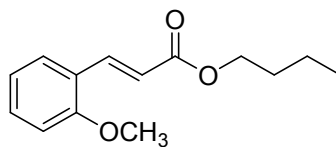

**Butyl 3-(2-methoxyphenyl) acrylate (3b)**

Purified by flush column chromatography(silica gel,Hexane/EtoAc=20/1);

$^1\text{H}$  NMR (400MHz,  $\text{CDCl}_3$ )  $\delta$  0.89 (t,  $J=7.6$  Hz, 3H), 1.33-1.36 (m, 2H), 1.62-1.65 (m, 2H), 3.75 (s, 3H), 4.14 (t,  $J=6.8$  Hz, 2H), 6.35 (d,  $J=16.0$  Hz, 1H), 6.84-6.86 (m, 1H), 6.96 (s, 1H), 7.03-7.05 (s, 1H), 7.18-7.24 (m, 1H), 7.57 (d,  $J=16.0$  Hz, 1H) ppm.

$^{13}\text{C}$  NMR (100MHz,  $\text{CDCl}_3$ )  $\delta$  9.4, 14.8, 26.4, 50.9, 60.1, 108.5, 111.7, 114.1, 116.4, 125.5, 131.4, 140.1, 155.5, 162.6.

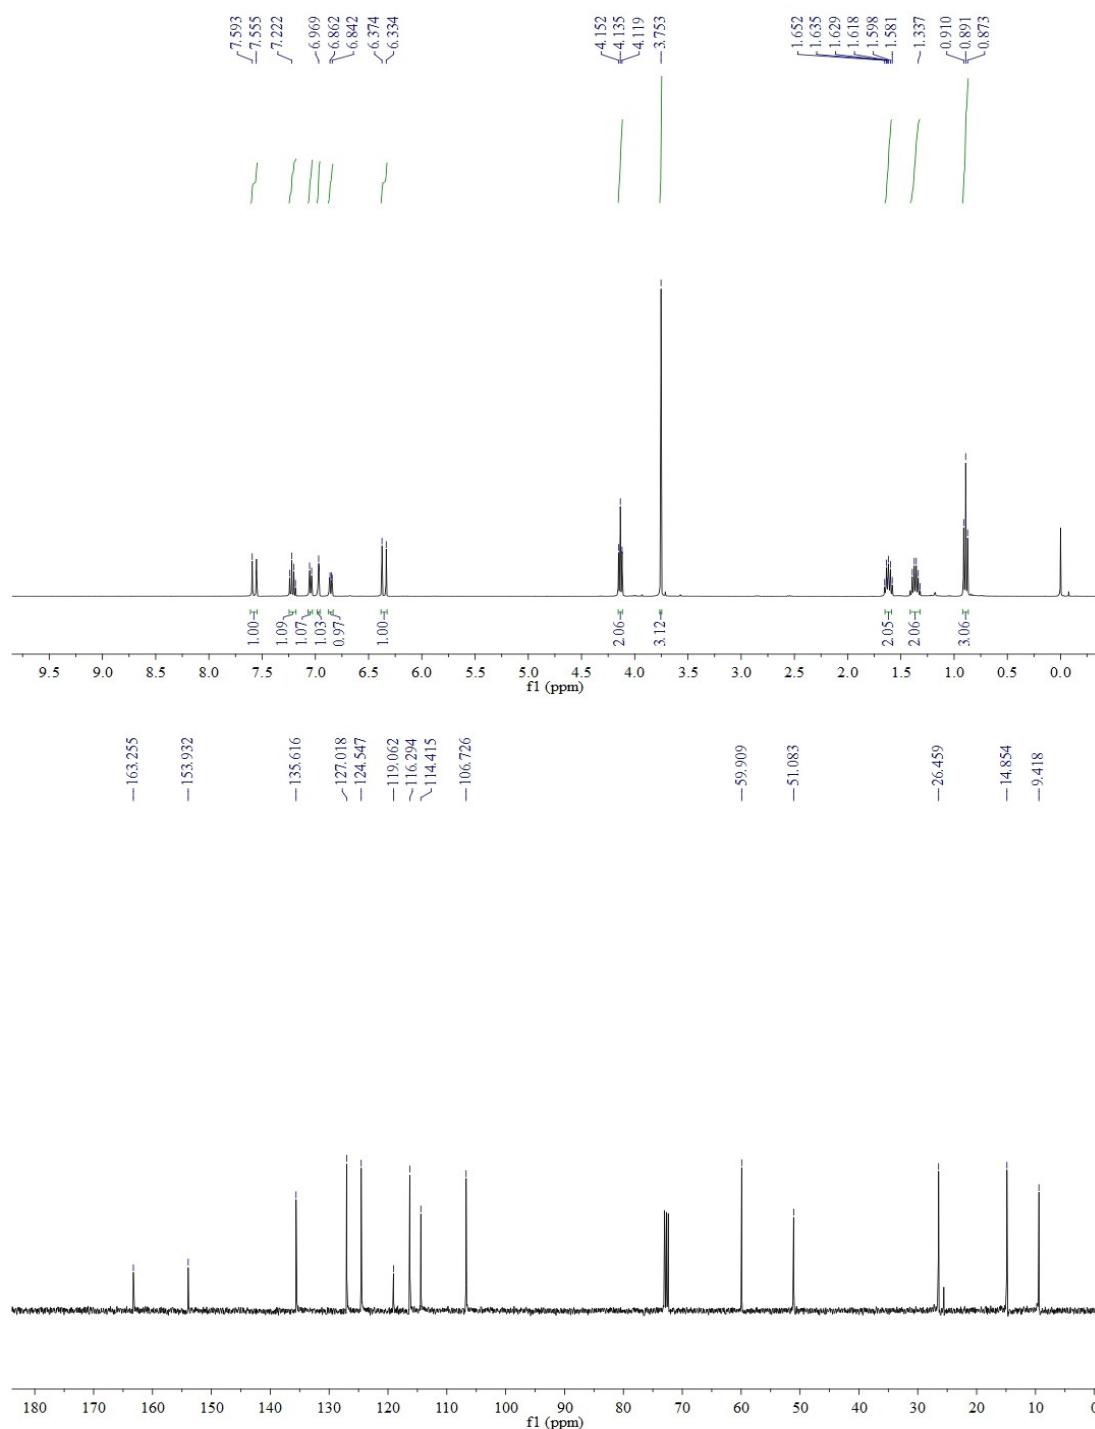

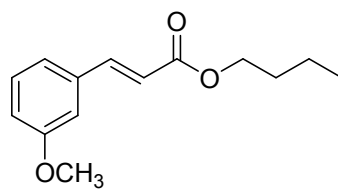

**Butyl 3-(3-methoxyphenyl) acrylate (3c)**

Purified by flush column chromatography (silica gel, Hexane/EtoAc=20/1);

$^1\text{H}$  NMR (400MHz,  $\text{CDCl}_3$ )  $\delta$  0.96 (t,  $J=6.8$  Hz, 3H), 1.42-1.44 (m, 2H), 1.69-1.70 (m, 2H), 3.88 (s, 3H), 4.21 (t,  $J=8.0$  Hz, 2H), 6.53 (d,  $J=16.0$  Hz, 1H), 6.89-6.97 (m, 2H), 7.31-7.34 (m, 1H), 7.49-7.51 (m, 1H), 7.80 (d,  $J=16.0$  Hz, 1H) ppm.

$^{13}\text{C}$  NMR (100MHz,  $\text{CDCl}_3$ )  $\delta$  9.4, 14.8, 26.5, 51.1, 60.0, 106.7, 114.4, 116.3, 119.1, 124.5, 127.0, 135.6, 153.9, 163.2 .

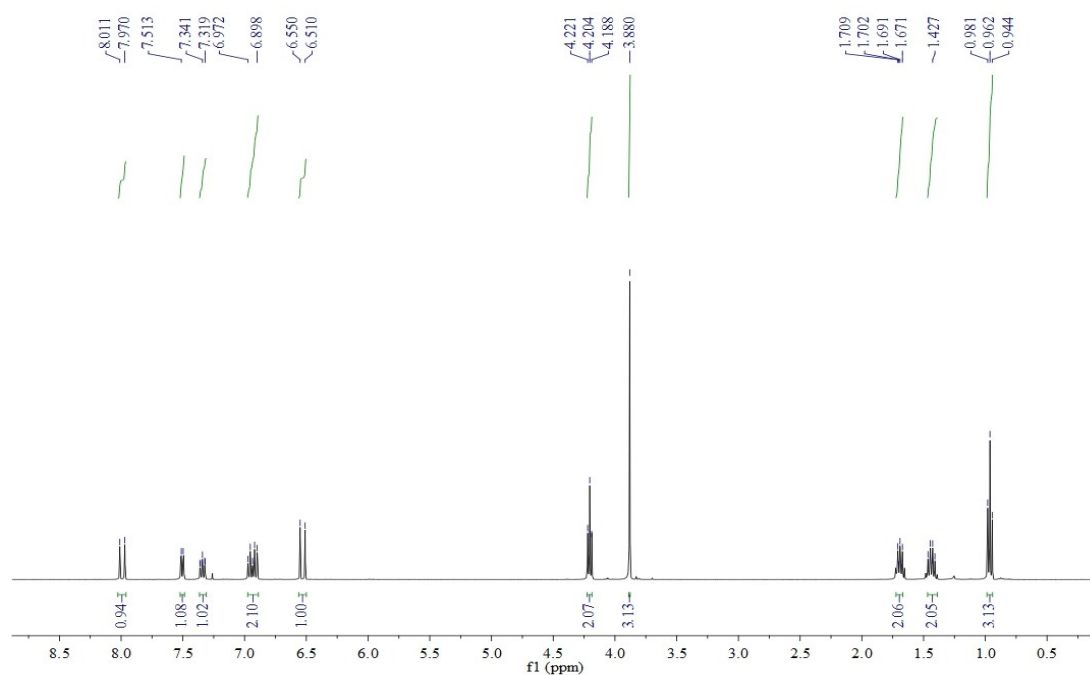

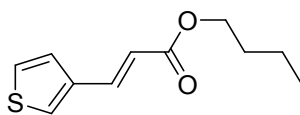

**Butyl 3-(thiophen-3-yl)acrylate (3i)**

Purified by flush column chromatography (silica gel, Hexane/EtoAc=20/1);

$^1\text{H}$  NMR (400MHz,  $\text{CDCl}_3$ )  $\delta$  0.99 (t,  $J=7.2$  Hz, 3H), 1.44-1.46 (m, 2H), 1.69-1.70 (m, 2H), 4.22 (t,  $J=6.8$  Hz, 2H), 6.27 (d,  $J=16.0$  Hz, 1H), 7.07-7.08 (m, 1H), 7.28 (s, 1H), 7.39 (d,  $J=4.8$  Hz, 1H) 7.80 (d,  $J=16$  Hz, 1H) ppm.

$^{13}\text{C}$  NMR (100MHz,  $\text{CDCl}_3$ )  $\delta$  13.7, 19.2, 30.7, 64.4, 117.0, 128.3, 130.8, 136.9, 140.2, 139.7, 167.0 .

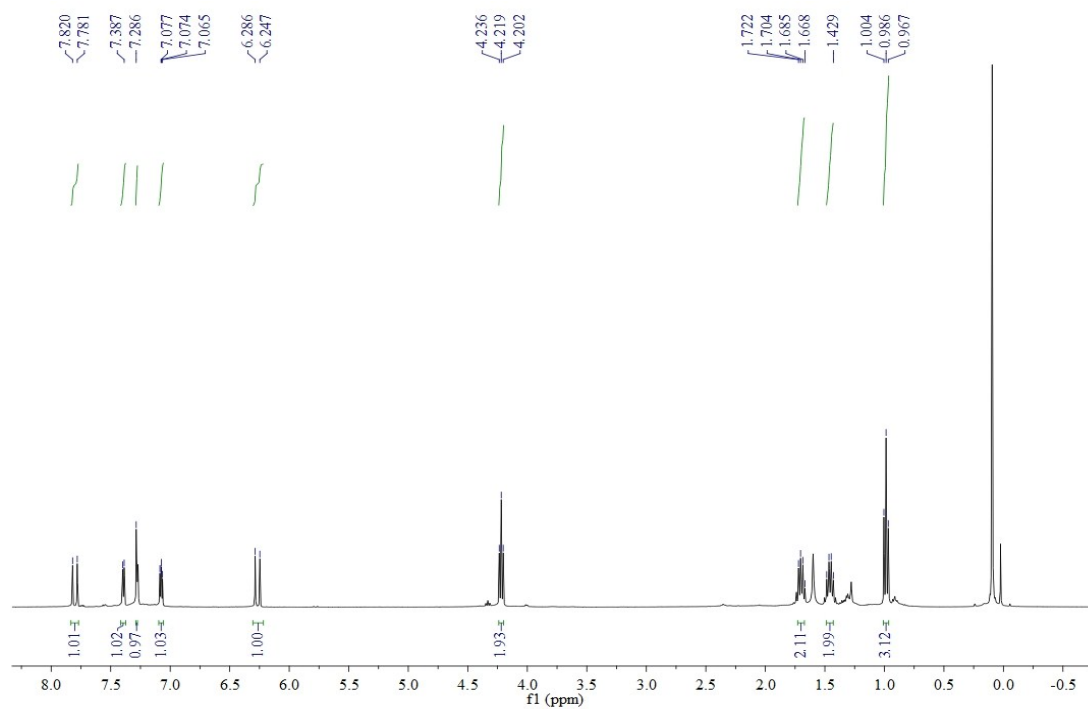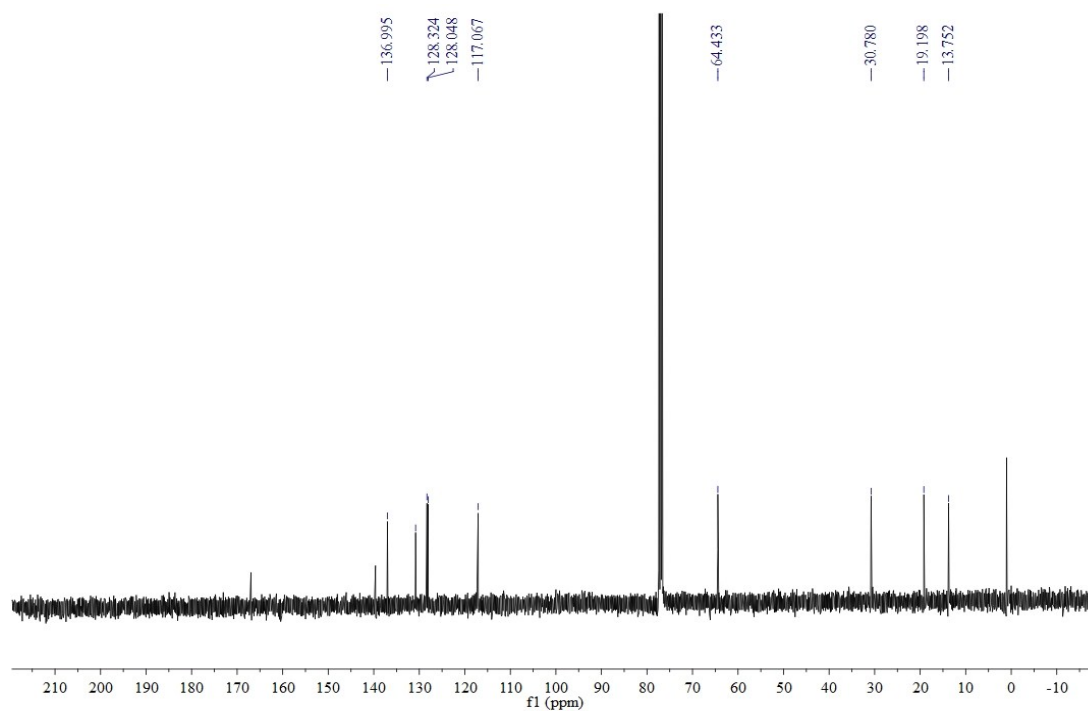

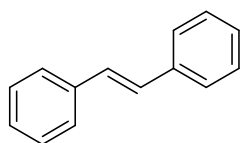

**1,2-diphenylethene (3k)**

Purified by flush column chromatography(silica gel,Hexane/EtoAc=60/1);

$^1\text{H}$  NMR (400MHz,  $\text{CDCl}_3$ )  $\delta$  7.07-7.08 (s, 2H), 7.21-7.23 (m, 2H), 7.32-7.34 (m, 4H,) 7.46-7.48 (m, 21H) ppm.

$^{13}\text{C}$  NMR (100MHz, $\text{CDCl}_3$ )  $\delta$  122.1, 123.2, 124.3, 132.9.

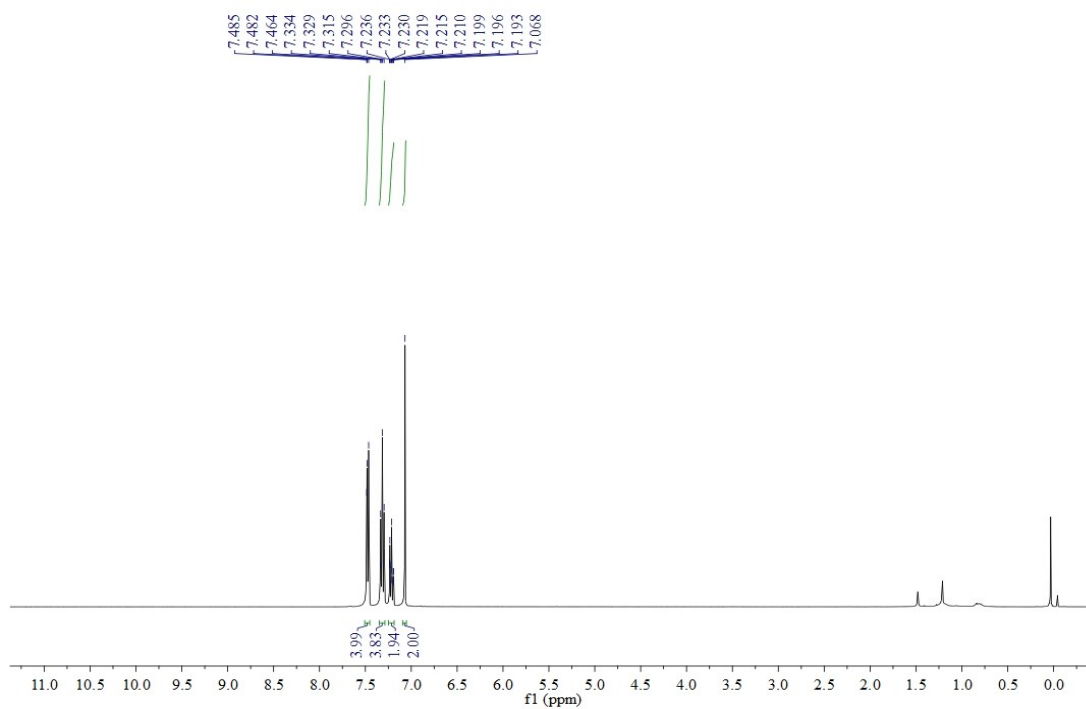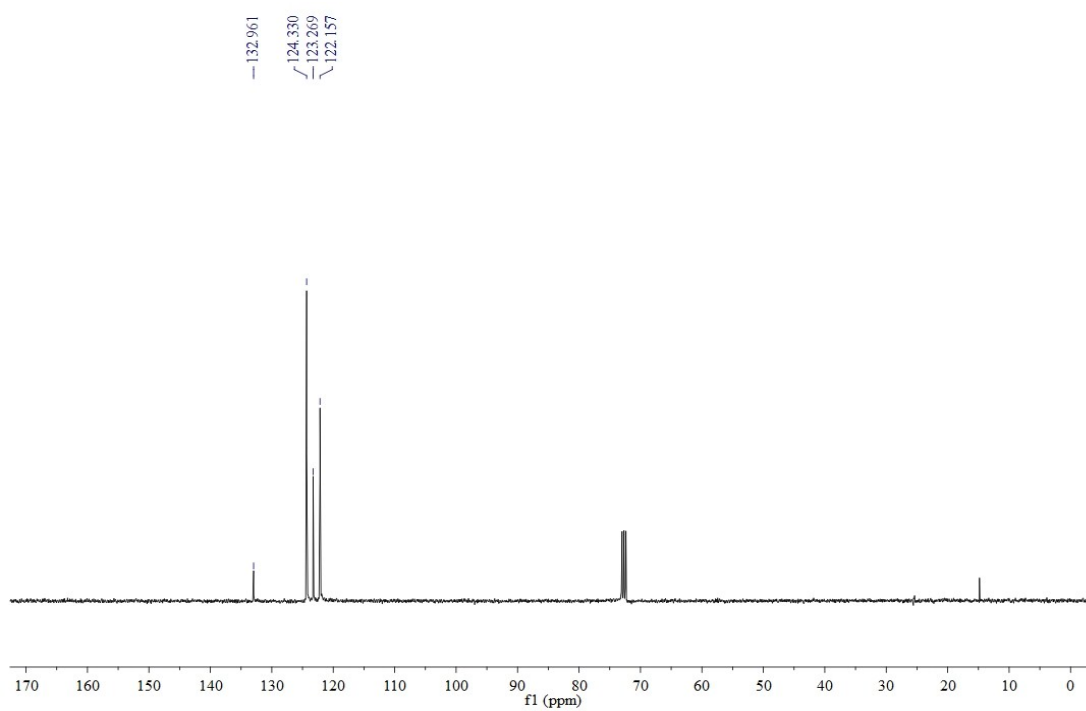

Supplement: c5ta03767k1.pdf [file c5ta03767k1.pdf]
